1       **Title: Using a large-scale biodiversity monitoring dataset to test the effectiveness of**  
2       **protected areas in conserving North-American breeding birds**

3  
4  
5       **Authors:** Victor Cazalis\*<sup>1</sup>, Soumaya Belghali<sup>1</sup>, Ana S.L. Rodrigues<sup>1</sup>

6       \* Corresponding author: [victor.cazalis@laposte.net](mailto:victor.cazalis@laposte.net)

7       <sup>1</sup>: Centre d'Ecologie Fonctionnelle et Evolutive, CEFE UMR 5175, CNRS – Univ. de Montpellier  
8       – Univ. Paul-Valéry Montpellier – EPHE – CNRS, Montpellier, France.

9  
10  
11       **Abstract:**

12       Protected areas currently cover about 15% of the global land area and constitute one of the main  
13       tools in biodiversity conservation. Quantifying their effectiveness at protecting species from  
14       decline and local extinction involves comparing protected with counterfactual unprotected sites  
15       representing “what would have happened to protected sites if they had not been protected”.  
16       Most studies are based on pairwise comparisons, using as counterfactuals neighbour sites to  
17       protected areas, but this choice is often subjective and may be prone to biases. An alternative is  
18       to use large-scale biodiversity monitoring datasets, which whereby the effect of protected areas  
19       is analysed statistically by controlling for landscape differences between protected and  
20       unprotected sites, allowing a more targeted and clearly defined measure of protected areas  
21       effect. Here we use the North American Breeding Bird Survey dataset as a case study to  
22       investigate protected areas effectiveness in conserving bird assemblages. We analysed the effect  
23       of protected areas on species’ richness, assemblage-level abundance and abundance of  
24       individual species by modelling how these metrics relate to the proportion of each site that is  
25       protected, while controlling for site habitat, altitude, productivity and spatial autocorrelation.  
26       At the assemblage level, we found no relationship between protection and species richness or  
27       overall abundance. At the species level, we found that species that avoid human activities tend  
28       to be favoured by protected areas are the one avoiding human activities. Moreover, we found  
29       that forest protected areas presented higher abundances of forest species, making the  
30       assemblage more typical of this habitat. We did not find that declining species were particularly  
31       favoured by protected areas. Our results highlight the complexity of answering the question of  
32       protected areas effectiveness, and the necessity to define clearly metrics measured and the  
33       controls used.

34  
35       **Acknowledgments:** We thank Jean-Yves Barnagaud for his insightful comments and  
36       suggestions concerning the analyses. We are grateful to all BBS birders and coordinators for  
37       the high quality data they have collected.

38  
39       **Keywords:** biodiversity conservation; biodiversity monitoring; protected areas effectiveness;  
40       birds; North-America BBS; conservation effectiveness.

## 41 Introduction

42 The increasing human footprint on natural ecosystems is leading to major declines in species'  
43 populations (McRae et al., 2016) and has already resulted in thousands of extinctions (IUCN,  
44 2018), to such an extent that Ceballos et al. (2017) characterised current times as a period of  
45 “biodiversity annihilation”. Habitat loss and degradation are the most important pressures on  
46 biodiversity (Vié et al., 2009; Balmford and Bond, 2005), as a result of anthropogenic activities  
47 such as agriculture, urbanisation, industry, transport and recreation (Foley et al., 2005). The  
48 most evident response to these threats is to establish areas with restricted, or even no human  
49 activities, *i.e.*, to create protected areas (PAs). Modern PAs have their origins in the 19<sup>th</sup> century  
50 and currently represent the most important conservation tool, with about 15% of the global land  
51 area already protected to some extent, and coverage planned to reach 17% by 2020 (UNEP-  
52 WCMC IUCN, 2016).

53  
54 Understanding the extent to which PAs are being effective as biodiversity conservation tools is  
55 fundamental for guiding future conservation efforts. Accordingly, there is a substantial and large  
56 literature on PA effectiveness: as of the 1<sup>st</sup> October 2018, 260 publications in the Web of Science  
57 included in their title “protected AND area\* AND effective\*”. However, within this literature  
58 there are disparate approaches to the concept of “effectiveness”.

59  
60 A first set of studies questions whether PAs are effective at representing species or ecosystems,  
61 using gap analyses for measuring the overlap between PAs and the distributions of species or  
62 ecosystem types (*e.g.*, Rodrigues et al., 2004; Brooks et al., 2004). These studies do not directly  
63 quantify the effectiveness of PAs at conserving biodiversity, but the extent to which species or  
64 ecosystems are buffered from human impacts under the assumption that PAs are highly effective  
65 in doing so. A second set of studies focuses on the means employed locally by PA managers in  
66 order to protect biodiversity, for example in terms of staff or money (*e.g.*, Leverington et al.,  
67 2010). These analyses do not directly measure PA effectiveness in reducing human impacts, but  
68 rather the resources allocated to this purpose. A third type of studies quantifies the effectiveness  
69 of PAs at preventing the conversion of natural ecosystems, typically by comparing land use  
70 change (*e.g.*, deforestation rates) in protected versus unprotected areas (Nelson and Chomitz,  
71 2009; Andam et al., 2008). These studies quantify PA effects at the habitat or ecosystem level,  
72 rather than at the species level. Finally, a set of analyses focuses on measuring the effect of PAs  
73 on species themselves, either on the diversity of assemblages or on the abundance of individual  
74 species, typically by contrasting protected versus unprotected sites (*e.g.* Coetzee et al., 2014;  
75 Gray et al., 2016; Devictor et al., 2007, discussed below). This fourth approach to PA  
76 effectiveness is the focus of the present study.

77  
78 Assessing the effectiveness of PAs in conserving species can be implemented by comparing  
79 population trends (*e.g.* Gamero et al., 2017; Devictor et al., 2007; Pellissier et al., 2013).  
80 Indeed, if PAs are effective, populations in them are expected to be better buffered from threats  
81 and thus decline less, or even to increase more, than those outside. Trends however can be  
82 misleading, because they are calculated in relation to a reference date (that seldom precedes all  
83 anthropogenic impacts) and because they are measured as percentages (which emphasise

84 changes in small numbers). Hence, for example, given a species in three sites: one where it  
85 remained stable at 1000 individuals; a second where it initially declined from 1000 to 10 and  
86 recently increased to 20; and a third where it first declined from 1000 to 800 and recently  
87 recovered to 1000. In terms of recent trends, the second site appears by far the most effective,  
88 even though it has the most depleted population, and even though in absolute numbers the  
89 population increase in the third site is 20 times more important. In this study, we focus instead  
90 on measures of PA effectiveness that assess current state, namely by contrasting population  
91 abundances and species diversity (e.g. Coetzee et al., 2014; Kerbiriou et al., 2018; Devictor et  
92 al., 2007). Indeed, if PAs have been effective in conserving species, we expect that over time  
93 that translates into higher absolute population abundances than in counterfactual areas, as well  
94 (if local extinctions have been prevented) in species diversity.

95  
96 Three recent studies investigated the effects of PAs on the state of species abundance and/or  
97 diversity, through meta-analyses of studies that made pairwise comparisons between protected  
98 and unprotected sites (Geldmann et al., 2013; Coetzee et al., 2014; Gray et al., 2016). The  
99 underlying studies used in these meta-analyses did not necessarily aim to measure PA  
100 effectiveness, more often they investigated the effects of anthropogenic pressure, using PAs as  
101 benchmarks (e.g. Sinclair et al., 2002; Bihn et al., 2008; Wunderle et al., 2006, all used in  
102 Coetzee meta-analysis). The meta-analyses considered that unprotected sites acts as  
103 counterfactuals to the protected sites (i.e., by assuming that the latter would be in a similar  
104 condition to the former had it not been protected), measuring the effect of protection as the  
105 observed difference between the two. Pairwise comparisons often compare neighbouring sites,  
106 which presents the advantage of ensuring that both have broadly similar environmental  
107 characteristics (e.g. same climate), but do not necessarily take in account the fact that PAs tend  
108 to be biased in their location towards higher altitudes and lower productivity areas (Joppa and  
109 Pfaff, 2009). To account for this, Gray et al. (2016) controlled for the differences in altitude,  
110 slope and agricultural suitability. Controlling for these factors means that their results are less  
111 influenced by PAs' location biases and, therefore, that they reflect more strongly the effects of  
112 protection itself. Another potential bias resulting from pairwise comparisons of neighbouring  
113 sites arises from the leakage effect, whereby the human activities that would have taken place  
114 inside a PA are displaced to areas around it, artificially inflating the perceived effectiveness of  
115 PAs (Ewers and Rodrigues, 2008). This effect is difficult to control for, but should be reduced  
116 if the counterfactual sites are not immediately adjacent to the PAs.

117  
118 An important decision when choosing a suitable spatial counterfactual to a PA, one that strongly  
119 affects the definition and thus the measure of PA effectiveness, is whether to control for habitat  
120 type or not. Indeed, not considering it could lead to comparing sites that are not expected to  
121 have similar biodiversity regardless of protection (e.g. protected grassland vs unprotected  
122 forest), while not considering it overlooks the effect of PAs through preventing habitat changes  
123 (e.g. deforestation or urbanization). For instance, given a hypothetical PA covering a natural  
124 grassland, possible counterfactuals include an unprotected natural grassland (same habitat, but  
125 unprotected), as well as a diversity of unprotected sites with different habitats, for example an  
126 extensive pasture (same vegetation structure, but with relatively low-level anthropogenic use),  
127 an herbaceous cropland (same vegetation structure but highly transformed), or an urbanised

128 area (a wholly different ecosystem). This choice is certain to have a major impact on the  
129 differences observed, and thus on the measure of PA effectiveness, but it is not necessarily  
130 obvious what the best counterfactual should be. In theory, it is the site that best represents “what  
131 would have happened to the PA in the absence of protection”; in practice, this is not necessarily  
132 easily determined. All three meta-analyses include comparisons where habitat has not been  
133 controlled for, meaning that the counterfactual’s habitat may be different or similar to the  
134 protected site’s habitat. Additionally, a subset of Gray et al. (2016)’s analyses focuses on  
135 comparisons between protected and unprotected sites with matched habitats. In this, the  
136 measure of PA effectiveness concerns protection from habitat degradation rather than  
137 protection from habitat conversion.

138  
139 Another key consideration in analysing PA effectiveness is the biodiversity metrics of interest.  
140 The three meta-analyses applied a diversity of metrics, some at the level of species’  
141 assemblages, some focused on individual species. Gray et al. (2016) used only assemblage-  
142 level metrics and found higher species richness and overall abundance inside PAs than outside,  
143 but no difference in rarefaction-based richness (i.e. number of species for a given number of  
144 individuals) nor in the proportion of endemic species. When matching sites with similar  
145 habitats, species richness was only higher in young and small PAs than in unprotected sites (no  
146 difference between other protected and unprotected sites), suggesting that the effect of PAs on  
147 habitat degradation was light. Conversely, Geldmann et al. (2013) considered only species-level  
148 metrics (presence, abundance, nest survival) and found contrasted but mainly positive effects  
149 of PAs. Finally, Coetzee et al. (2014) considered both levels; at the assemblage level, they found  
150 higher species richness and overall abundance in protected than in unprotected sites; at the  
151 species level, they found that individual species abundances were typically higher inside PAs.

152  
153 In this study, we use a different approach for quantifying PA effectiveness, one which is not  
154 based on pairwise comparisons, but instead takes advantage of a large dataset compiling bird  
155 counts across a near-continental area: the North American Breeding Bird Survey (Pardieck et  
156 al., 2017). This approach has already been used in other geographical areas, with other datasets  
157 (e.g. Devictor et al., 2007 with French birds; Kerbiriou et al., 2018 with French bats; Duckworth  
158 and Altwegg, 2018 with South-African birds) with heterogeneous results but mainly showing  
159 positive effects of PAs. In this approach, instead of pairing sites, the effect of PAs is quantified  
160 through statistical models in which covariates control for differences between protected and  
161 unprotected sites. This removes the subjectivity in the choice of counterfactuals, by making it  
162 clear which variables are controlled for, and the measure of effectiveness being investigated. In  
163 our study, we control for altitude and productivity in order to reduce the effect of PA location  
164 biases. We estimate PA effectiveness on two levels of biodiversity: on species’ assemblages,  
165 through indices of richness and summed abundance; and on individual species, by estimating  
166 the effect of PAs on species’ abundance for the most common species. At the assemblage level,  
167 we expect to find higher species diversity inside PAs. Indeed, as human activities are causing  
168 species population declines and local extinctions (Ceballos et al., 2017), and as PAs are  
169 expected to buffer against these activities, this should predictably lead to overall higher species  
170 richness and higher total abundance inside PAs, as found by Coetzee et al. (2014) and Gray et  
171 al. (2016). At the species level, we expect individual species’ abundances to be higher in PAs.

172 However, given differences in species' habitat requirements, this result cannot be expected to  
173 hold universally (*i.e.*, species are not all expected to be more abundant in all PAs). For example,  
174 we expect protected forests to have a positive effect on forest species, but not on grassland  
175 species. To take this into account, we control in our analyses for broad vegetation structure  
176 (forest, shrub, herbaceous), by investigating separately the effects of PAs dominated by a  
177 particular vegetation structure on species with different habitat requirements. Additionally, we  
178 expect species with overall declining populations (thus more affected by anthropogenic  
179 activities), and species that avoid human presence (more sensitive to human disturbance) to  
180 present higher abundances inside PAs.

## 181                   Methods

182   As stated in the introduction, in this study we will use the term PAs effectiveness as the  
183   difference in diversity or abundance between protected and unprotected sites, acknowledging  
184   that it includes both effectiveness to select the most interesting sites for conservation when  
185   implementing PAs and the effectiveness in create more positive or less negative biodiversity  
186   trends inside PAs.

### 187                   Bird data

188   We used data from the North-American Breeding Bird Survey (BBS), a long-term volunteer-  
189   based monitoring scheme in Canada, the USA, and Mexico (Pardieck et al., 2017). Here we  
190   studied only Canada and the USA, as few Mexican routes are monitored. This program is based  
191   on the annual monitoring of 25-mile routes during the breeding season. Each route is split into  
192   50 stops; at each stop, the observer counts every bird heard or seen during three minutes, before  
193   moving to the next stop.

194  
195   Given the length of BBS routes, they often intersect multiple land use types (e.g. forested,  
196   urban, agriculture, with different bird assemblages), and they are rarely wholly contained within  
197   protected sites (most of the routes that cross PAs do so only in small fractions of their length).  
198   As a result, whole BBS routes are not particularly suited sampling units for investigating how  
199   PAs affect bird species. We chose instead to focus on small sections of BBS routes – sequences  
200   of five stops, covering about 2.5 miles – in order to obtain field sampling units that are less  
201   heterogeneous in land type and for which there is a stronger correspondence between the  
202   presence or PAs and the bird assemblages detected. For each route, we only used the first  
203   sequence of five stops, because the only precisely georeferenced point we had access to was  
204   the starting stop of each route. Indeed, even if in principle additional stops are spaced about 0.5  
205   miles from each other, in practice this distance can vary, making the location of additional stops  
206   in each route progressively more imprecise. Henceforth, and for simplicity, we use the term  
207   “routes” to refer to these initial sections of five stops rather than to entire routes.

208  
209   We excluded bird taxa that are not well detected by this diurnal road-based monitoring scheme  
210   (aquatic and nocturnal birds), those that correspond to non-indigenous species, and hybrids.  
211   Overall, we analysed 400 species.

212  
213   We focused on routes sampled at least 5 years between 2007 and 2016, obtaining a set of 3,427  
214   routes analysed. For routes sampled more than five years, we analysed only five (randomly  
215   selected) years of data, thus ensuring a consistent sampling effort across all routes. For each  
216   species, the abundances were summed across the five points and the five years, giving a single  
217   value per species per route. We winsorized the abundances of each species (*i.e.*, values above  
218   95% quantiles were reduced to the 95% quantile value) to limit the impact of extreme values.

### 220                   Landscape data

221   For each route, we analysed the properties of the landscape within a 500 m buffer around the  
222   route’s 2.5-mile track (total area ca. 6 km<sup>2</sup>), which we considered as a suitable description of  
223   the environment affecting the composition of birds detected by the BBS and which corresponds

224 broadly to the bird detection radius of the BBS. Small et al. (2012) showed that the immediate  
225 landscape composition (buffer of 0.4 km) of BBS routes was similar to large-scale landscape  
226 composition (buffer of 10 km), so this choice is not expected to strongly affect the results.

227

228 Protected area is defined by the IUCN as “a clearly defined geographical space, recognised,  
229 dedicated and managed, through legal or other effective means, to achieve the long term  
230 conservation of nature with associated ecosystem services and cultural values”. They are  
231 categorised by the IUCN within seven categories based on their protection level from Ia “strictly  
232 protected areas set aside to protect biodiversity [...], where human visitation, use and impacts  
233 are strictly controlled and limited to ensure protection of the conservation values.” to VI which  
234 “conserve ecosystems and habitats together with associated cultural values and traditional  
235 natural resource management systems. They are generally large, with most of the area in a  
236 natural condition, where a proportion is under sustainable natural resource management and  
237 where low-level non-industrial use of natural resources compatible with nature conservation is  
238 seen as one of the main aims of the area” (UNEP-WCMC and IUCN, 2018). We used the PAs’  
239 shapefile, including both locations and IUCN categories of PAs, which was provided by the  
240 World Database on Protected Areas (UNEP-WCMC and IUCN, 2018). We calculated the  
241 proportion of area inside each route’s buffer that falls within a PA (all IUCN-categories  
242 combined, and dissolved to avoid double-counting of areas under multiple PA designations).  
243 We have also run analyses considering stricter PAs only (categories I-IV), as the effectiveness  
244 can vary with protection level.

245

246 For each route, we obtained values according to four environmental variables: net primary  
247 productivity, altitude, human footprint, and type of vegetation structure. The first three are  
248 continuous variables, available as raster files, and we obtained a mean values across all pixels  
249 that overlap the respective buffer: net primary productivity as the mean during spring months  
250 (March to June) between 2004 and 2015 according to the monthly Net Primary Productivity  
251 Terra/Modis (NASA, 2017; resolution 0.1 degree, about 62 km<sup>2</sup> at 45°N); altitude using  
252 GLOBE Digital Elevation Model (National Geophysical Data Center, 1999; resolution 0.008  
253 degree, about 0.40 km<sup>2</sup> at 45°N); human footprint from the 2009 Global terrestrial Human  
254 Footprint (Venter et al., 2016; resolution 0.01\*0.008, about 0.50 km<sup>2</sup> at 45°N). We defined the  
255 vegetation structure as a categorical variable with three types: forest, shrub and herbaceous. We  
256 started by reclassifying the land cover classes in the Global Land Cover 2000 layer (Bartholomé  
257 and Belward, 2005; resolution 0.009 degree, about 0.50 km<sup>2</sup> at 45°N) into the three vegetation  
258 structure types: forest from land cover classes 1-9 (N=1,749 routes); shrub, 11-12 (N=409);  
259 herbaceous, 13-16 (which includes croplands; N=1,140). We then obtained the main vegetation  
260 structure type for each route as the dominant in the buffer. Routes which were dominated by  
261 other land use classes (burned trees, 10; mosaic, 17-18; bare areas, 19; water areas 20-21;  
262 artificial, 22) were not analysed because too scarce. Routes used in analyses are mapped in  
263 Appendix S1.

264

## 265 Statistical analyses

266 We estimated the effect of PAs on each of two assemblage indices (species richness and summed  
267 abundance) and on the abundance of individual species using General Additive Models  
268 (GAMs). Models all had identical structures, with the response variable modelled as function  
269 of the proportion of PAs inside the buffer, interacting with vegetation structure type. We added  
270 smoothed terms controlling for productivity and altitude, as PAs are globally biased towards  
271 high altitude and low productivity areas (Joppa and Pfaff, 2009), as well as longitude and  
272 latitude in order to correct for spatial autocorrelation:

273  $\text{Response} \sim \text{PA} * \text{vegetation} + \text{s}(\text{productivity, altitude, longitude, latitude})$

### 274 Assemblage level

275 For each route, and across all 400 bird species analysed, we calculated two assemblage indices,  
276 in each case using the cumulative number of species or individuals seen across the 5 stops, over  
277 5 years: species richness ( $\mu = 28.6 \pm 9.5$  species); summed bird abundance across all species ( $\mu =$   
278  $249 \pm 88$  individuals). We then used a GAM to model each of these two assemblage variables  
279 against the above-mentioned covariates, assuming a Gaussian distribution for richness and a  
280 negative binomial distribution for abundance.

### 281 Species level

282 We excluded the rarest species from this analysis, keeping only the 149 species observed on  
283 more than 100 routes, in order to have enough statistical power. For each species, we only  
284 analysed routes within the species' distribution within our study area. We obtained an  
285 approximation of this distribution by delimiting the 90 % spatial kernel of the routes where the  
286 species was observed, using the 'adehabitat' R package (Calenge, 2006). We treated all routes  
287 inside the kernel where the species was not observed as having zero abundance.

288  
289 We modelled each species' abundance using a GAM as mentioned above, with a Poisson  
290 distribution. We then calculated for each species a "PA effect" (PAE), measured as the difference  
291 in predicted abundance between a fully protected and an unprotected route with all control  
292 variables fixed to their median values. We calculated PAE separately for each of the three types  
293 of vegetation structure, to obtain for each species a value of  $\text{PAE}_{\text{For}}$  for routes dominated by  
294 forest,  $\text{PAE}_{\text{Shrub}}$  for shrub routes, and  $\text{PAE}_{\text{Herb}}$  for herbaceous routes.

295  
296 For each type of vegetation structure, we studied PAE values in order to understand the factors  
297 explaining which species are favoured or not by PAs. To do so, we used a linear model (LM)  
298 and two phylogenetic linear models (phyBM and phyL, see below) with species-level  
299 covariates. We considered three covariates: species' habitat preference, population trend, and  
300 human-affinity. We extracted from Del Hoyo et al. (2013) species' main habitat (11 categories;  
301 see Fig.2). We used species' population trends in North America between 1966 and 2015,  
302 calculated for each species by Sauer et al. (2017) from the BBS data (negative number for  
303 declining species, positive for increasing species). We winsorized these values, folding down  
304 the 2.5% extreme values on each side, bringing estimates to a Gaussian distribution. Finally,  
305 we estimated for each species a human-affinity index, as the median human footprint of the  
306 routes where the species was observed, weighted by species' abundance on the route.

307



308 The two phylogenetic models used are the Brownian motion model (phyBM) and the Lambda  
309 model (phyL), both implemented in the '*phylolm*' R package (Tung Ho and Ané, 2014). To  
310 obtain the bird phylogeny, we selected randomly 100 phylogenetic trees over 10,000 from Jetz  
311 et al. (2012) and calculated a maximum clade credibility tree using *Tree Annotator* from *Mr*  
312 *Bayes* (Drummond et al., 2012) with no burnin, and node heights calculated with the median.

313  
314  
315  
316  
317  
318  
319  
320  
321  
322  
323  
324  
325  
326  
327  
328  
329  
330  
331  
332  
333  
334  
335  
336  
337  
338  
339  
340  
341  
342  
343  
344  
345  
346  
347  
348  
349  
350  
351  
352  
353  
354

## Results

### Assemblage-level analyses

At the assemblage level, species richness and summed abundance differed very significantly between vegetation structure types (respectively  $P < 2.10^{-16}$ ,  $P = 1.10^{-6}$ ), underlying the importance of accounting for habitat differences when studying PAs effect.

However, neither species richness, nor summed abundance were significantly affected by the proportion of PAs in the buffer (respectively  $P = 0.13$ ,  $P = 0.13$ ), or its interaction with vegetation structure type (respectively  $P = 0.20$ ,  $P = 0.29$ ). This lack of significance between assemblage indices and the proportion of PAs in the buffer was also true when not controlling for vegetation structure (respectively  $P = 0.68$ ,  $P = 0.058$ ).

### Species-level analyses

$PAE_{For}$  – the predicted difference in a given species' abundance between protected *versus* unprotected forest routes – differed significantly depending on the species' main habitat, under both LM and phyL models but not under phyBM model. Hence, the first two models indicate that within forest routes, species with any type of forest as main habitat (mixed, deciduous, forest, conifer; Table 1 and Fig.2) are predicted to have significantly higher abundances when routes are protected. We found no significant PA effect within forest routes for species favouring other habitat types.

In all models, species' population trends between 1966 and 2015 did not significantly explain  $PAE_{For}$  (Table 1). In contrast, species' human-affinity was significantly negatively correlated with  $PAE_{For}$  (*i.e.*, species with lower affinity to humans had higher effects of PAs in forested routes; Table 1, Fig.3). This effect was also significant when only forest species were considered (green dots in Fig.3; see Supporting Information in Appendix S2 for additional test).

The effect of PAs within shrub routes ( $PAE_{Shrub}$ ) and within herbaceous routes ( $PAE_{Herb}$ ) was not affected by species' main habitat under any of the models (Supporting information, Appendix S3).  $PAE_{Shrub}$  decreased significantly with species' trend under all models (*i.e.*, declining species had higher effects of PAs in shrub routes), whereas it decreased with human-affinity only under model phyBM.  $PAE_{Herb}$  was not significantly correlated with any of the three covariates.

These results, however, need to be interpreted taking into account that shrub or herbaceous protected routes were rare in our dataset: on average, each species' kernel included only 10 shrub and 7 herbaceous routes protected by 50% or more, contrasted with 60 protected forest routes (Fig.1; see Appendix S4 in Supporting Information). The lack of significance in models with  $PAE_{Shrub}$  and  $PAE_{Herb}$  might thus be due to the limited number of protected routes in the sample, whereas the significant correlations between  $PAE_{Shrub}$  and both species' trends and human-affinity might not be robust.

355 Results, both at the assemblage and at the species levels, were similar but less significant when  
 356 we considered only PAs of stricter management, as defined by IUCN categories I-IV (Dudley,  
 357 2008; see Supporting Information, Appendix S6). For shrub and herbaceous routes, the number  
 358 of protected routes was even smaller than when all PAs were considered, leading to aberrant  
 359 results.

360  
 361 Table 1: Model summaries regarding the estimated effect of PAs on species within forest routes ( $PAE_{For}$ ): linear  
 362 model (LM), phylogenetic linear model with Brownian motion model (phyBM), phylogenetic linear model with  
 363 Lambda model (phyL). The top part gives estimates and P-values for all covariates, the bottom part gives estimates  
 364 and P-values for all species' habitat preferences, with trend and human-affinity fixed to zero. N corresponds to the  
 365 number of species in each case.

366 \* P-values for the habitat variable as a whole could not be obtained, as Anova tables are not implemented in the 'phylolm' package.

|                         | LM       |                          | PhyBM    |              | PhyL     |                          |
|-------------------------|----------|--------------------------|----------|--------------|----------|--------------------------|
| Model variables         | Estimate | P                        | Estimate | P            | Estimate | P                        |
| Habitat                 | -        | <b>2.10<sup>-8</sup></b> | -        | NA*          | -        | NA*                      |
| Trend                   | 0.027    | 0.602                    | 0.039    | 0.544        | 0.027    | 0.59                     |
| Human-affinity          | -0.079   | <b>0.005</b>             | -0.065   | <b>0.022</b> | -0.076   | <b>0.008</b>             |
| Main habitats           |          |                          |          |              |          |                          |
| Mixed forest (N=16)     | 0.98     | <b>1.10<sup>-4</sup></b> | 0.80     | 0.48         | 0.96     | <b>2.10<sup>-4</sup></b> |
| Forest (N=7)            | 0.77     | <b>0.0167</b>            | 0.69     | 0.55         | 0.75     | <b>0.02</b>              |
| Deciduous forest (N=18) | 0.86     | <b>0.0022</b>            | 0.59     | 0.60         | 0.83     | <b>0.003</b>             |
| Conifer forest (N=22)   | 0.83     | <b>4.10<sup>-5</sup></b> | 0.38     | 0.73         | 0.79     | <b>2.10<sup>-4</sup></b> |
| Semi open (N=27)        | 0.29     | 0.23                     | 0.18     | 0.88         | 0.27     | 0.27                     |
| Riparian (N=18)         | 0.28     | 0.27                     | 0.11     | 0.92         | 0.26     | 0.32                     |
| Generalist (N=2)        | 0.49     | 0.37                     | 0.03     | 0.98         | 0.46     | 0.40                     |
| Shrub (N=19)            | 0.07     | 0.78                     | -0.22    | 0.84         | 0.046    | 0.85                     |
| Arid (N=5)              | -0.27    | 0.44                     | -0.22    | 0.85         | -0.29    | 0.41                     |
| Open (N=14)             | -0.41    | 0.13                     | -0.36    | 0.75         | -0.43    | 0.11                     |
| Urban (N=1)             | -0.87    | 0.27                     | -0.95    | 0.69         | -0.91    | 0.25                     |

367

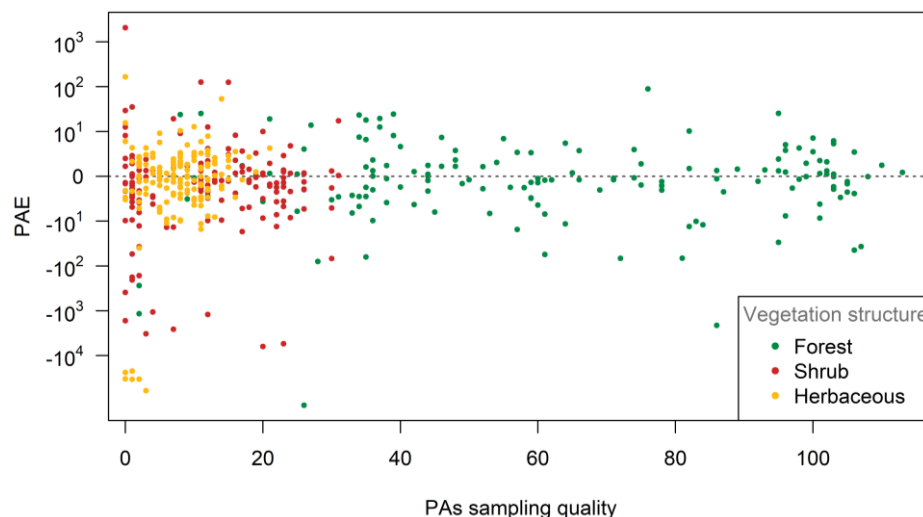

368

369 Figure 1: Estimated Protected Areas effect per species (PAE) (represented on a log scale in both negative and  
 370 positive values), against PAs sampling quality, per vegetation structure type of the routes. PAs sampling quality  
 371 was quantified as the number of routes within the species' kernel with at least 50% of the buffer area covered by  
 372 PAs. Each point in the plot corresponds to a species, and each species can be represented up to three times, one  
 373 for each vegetation structure type.

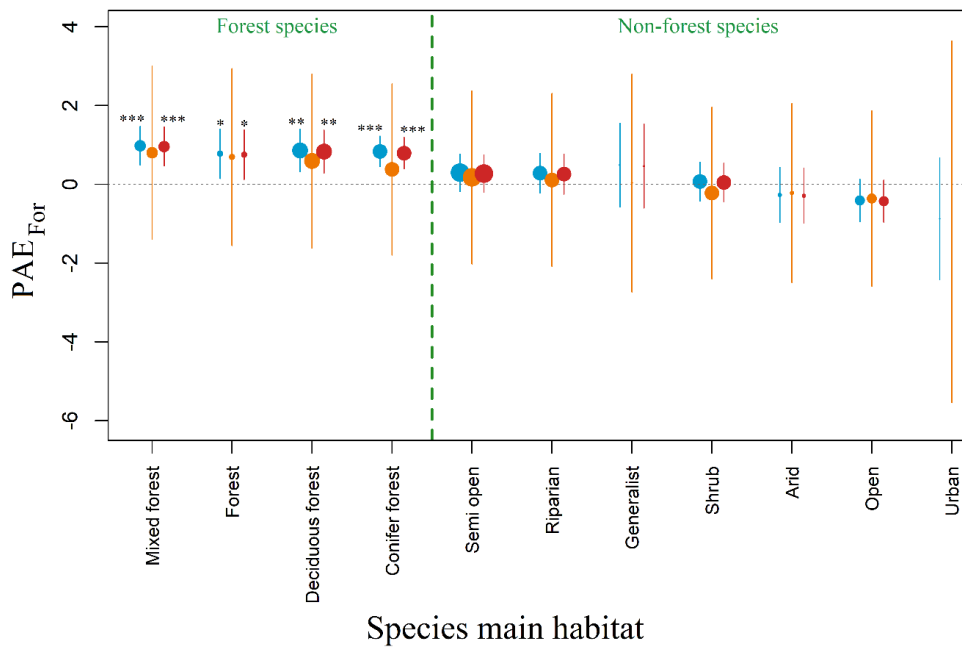

374

375 Figure 2: Estimated effect of PAs on species within BBS forest routes ( $PAE_{For}$ ) per species' main habitat (Del  
 376 Hoyo et al., 2013), estimated with three models: linear model (LM, blue), phylogenetic linear model with Brownian  
 377 motion model (phyBM, orange), and phylogenetic linear model with Lambda model (phyL, red). Estimates were  
 378 all calculated with species' population trend and human-affinity fixed to zero. Error bars represent 95% CI; dots  
 379 sizes are proportional to the number of species in each habitat group. Stars indicate significant effects for the  
 380 particular model, for the particular species' main habitat ( $P: 0.05 < * < 0.01 < ** < 0.001 < ***$ ). Habitat types are  
 381 ordered from the highest to the lowest  $PAE_{For}$  values under phyBM model.

382

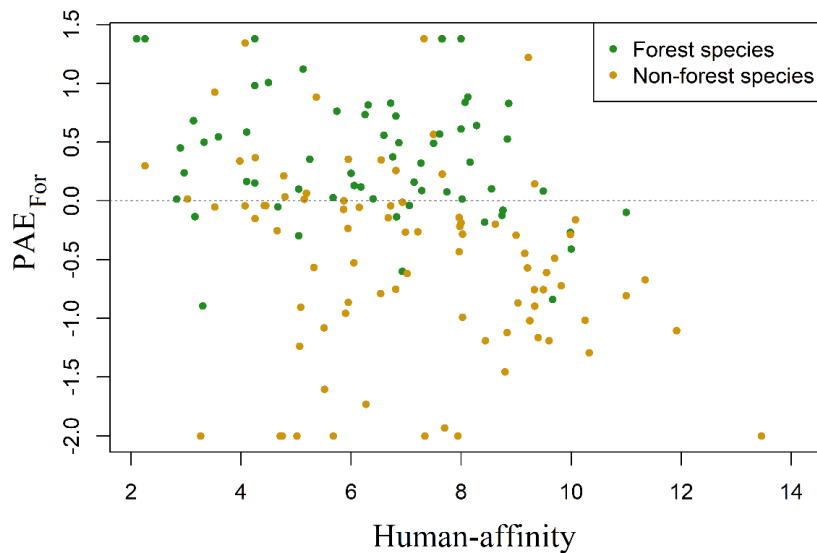

383

384 Figure 3: Species' human-affinity (higher for species found preferably in areas of higher human footprint) against  
 385 the estimated effect of PAs on species within BBS forest routes ( $PAE_{For}$ , high for species whose abundance in  
 386 forest routes is higher in protected rather than in unprotected areas). Forest species (green) are species whose main  
 387 habitat is "forest", "conifer forest", "mixed forest" or "deciduous forest"; non-forest species (brown) are all other  
 388 species.

389

## Discussion

390 We compared the effect of PA coverage on bird species diversity, using assemblage indices  
391 (species richness, summed abundance) and individual species' abundances.

392

393 At the assemblage level, we did not find significant differences in species richness or summed  
394 abundance between protected and unprotected sites, irrespective of whether vegetation structure  
395 was taken into account or not. In one sense, this is not surprising, particularly when it comes to  
396 species richness: according to the intermediate disturbance hypothesis, an area with low human-  
397 induced disturbance can have higher species richness than a pristine area (Roxburgh et al.,  
398 2004). Accordingly, Hiley et al., (2016) found lower alpha avian diversity in Mexican PAs than  
399 in unprotected areas. However, our results contrast with previous studies investigating this  
400 question such as Coetzee et al. (2014) or Gray et al. (2016), which found a positive effect of  
401 PAs on species richness and summed abundance, including in North America (Coetzee et al.,  
402 2014). These two studies being meta-analyses, it is possible that a publication bias against  
403 studies showing negative or null effects of PAs (discussed by Coetzee et al., 2014) artificially  
404 increased the difference they measured. This is even more so the case given that the underlying  
405 studies of the meta-analyses were often designed to measure the effect of anthropogenic  
406 pressures, using PAs as benchmarks, rather than measuring the effectiveness of PAs (e.g.  
407 Sinclair et al., 2002; Bihn et al., 2008; Wunderle et al., 2006, all used in Coetzee meta-analysis),  
408 and may thus have focused on particularly intact protected sites and/or in highly degraded non-  
409 protected sites. Conversely, our study may not be representative of studies at a global scale, for  
410 example if North American birds are less sensitive to human activities than other taxa in North  
411 America and/or birds in other regions, or if there is less contrast in human impacts in protected  
412 *versus* unprotected areas in North America than elsewhere. In addition, the lack of difference  
413 between protected and unprotected sites in terms of richness and abundance could also  
414 potentially be explained by a difference in species' detectability (Boulinier et al., 1998) if PAs  
415 protect mainly species that are difficult to detect. This detection problem should not affect our  
416 result at the species level.

417

418 Even if overall species richness and abundance are similar, PAs may nonetheless have an effect  
419 on avian assemblages if different species respond differently to protection. We found that in  
420 routes whose vegetation is dominated by forests, PAs seem to have an overall positive effect  
421 on species' abundance, but only for those species with forest as their main habitat. Forest PAs  
422 thus seem to maintain a more forest-typical bird assemblage than comparable unprotected  
423 forests. This effect was significant with the linear model, and with one (phyL), but not the other  
424 (phyBM) of the two phylogenetic linear models. This suggests that much of the effect attributed  
425 to habitat preferences under the linear model can actually be considered as phylogenetic  
426 difference, which is not surprising as bird habitat preferences and phylogeny are correlated.  
427 Phylogenetic models could theoretically allow us to measure the effectiveness of PAs in  
428 protecting species across phylogeny, and to check if some taxa were not effectively protected  
429 (e.g., they could highlight that a given family is not protected by PAs). However, to draw such  
430 conclusions, we would need to know how species are affected by PAs in each vegetation  
431 structure types, which is not the case here. Therefore, phylogenetic models give little

432 information here, only highlighting that the difference in  $PAE_{For}$  between species habitat  
433 preferences is correlated with phylogeny. Moreover, all models indicate that species with low  
434 human-affinity (*i.e.*, species that avoid human-impacted areas) are more favoured by forest PAs.  
435 This highlights that forest PAs protect species that are the most sensitive to human pressure,  
436 while species with high human-affinity, often benefiting from human presence, showed lower  
437 abundances inside PAs. Contrary to our expectation, and to previous results for common French  
438 birds (Devictor et al., 2007), we found no correlation between species' population trends over  
439 the past 50 years and  $PAE_{For}$ . This may reflect the fact that our model included only relatively  
440 common species (*i.e.*, observed on at least 100 routes in the studied years). It is thus possible  
441 that the most endangered species are favoured by PAs, but that we could not measure it.

442  
443 Our models suggested that PAs in shrub areas have a beneficial impact on declining species and  
444 those with low human-affinity, whereas we did not find significant results for herbaceous areas.  
445 Given the scarcity of protected routes within both of these vegetation structure types, we do not  
446 consider these results robust or informative of the effectiveness of PAs, but they nonetheless  
447 emphasise the biases of BBS routes against shrub areas and herbaceous PAs (Appendix S4).

448  
449 Given that PAs located in forests are not expected to favour the same species as PAs located in  
450 grasslands or shrub lands, we controlled for vegetation structure in our analyses of PA effects.  
451 However, this control masked the effect PAs may have had in preventing changes in vegetation  
452 structure (and associated changes in bird assemblages). For instance, given the vegetation  
453 structure categorisation we applied, the counterfactual for a protected forest was an unprotected  
454 forest, which does not take into account the possibility that the PA may have prevented the  
455 forest from being cleared. In other words, our approach does not measure the effect PAs can  
456 have on species diversity by preventing habitat destruction (that modifies vegetation structure  
457 type), only the effects PAs can have in preventing habitat degradation (not modifying the  
458 vegetation structure type), for example from natural forest to exploited forest, or from natural  
459 grassland to croplands.

460  
461 Pairwise comparisons of protected *versus* unprotected sites, and thus the meta analyses from  
462 Geldmann et al. (2013), Coetzee et al. (2014) and Gray et al. (2016), can take into account the  
463 combined effects of habitat destruction and habitat degradation on species diversity, given that  
464 the counterfactual chosen may well have a different habitat structure than the protected site  
465 (*e.g.*, a protected forest compared with an unprotected cropland). Nonetheless, defining the  
466 effectiveness measured in these meta-analyses is not straightforward, as it depends heavily on  
467 the choice of counterfactuals in underlying studies, which are defined directly by authors  
468 depending on their objectives. For instance, as discussed before, numerous studies used in the  
469 meta-analyses compare a highly degraded site with a protected site used as benchmark, in order  
470 to estimate the impact of anthropogenic degradation, which can lead to an overestimate of PA  
471 effectiveness. Other studies aimed to estimate PA effectiveness directly (*e.g.* Wasiolka and  
472 Blaum, 2011; Lee et al., 2007), but their choice of counterfactual was subjectively based on  
473 what authors considered likely to have happened to the protected site had it not been protected  
474 (Coetzee et al., 2014). Finally, some other studies used in meta-analyses were not particularly  
475 interested in differences between protected and unprotected sites, protection was only used as

476 a covariate explaining potentially some noise around the signal the authors were interested in  
477 (e.g. Naidoo, 2004; McCarthy et al., 2010). Because of the diversity of approaches used in these  
478 meta-analyses, it is difficult to define precisely what has been measured as PA effectiveness.  
479 Although our approach does not allow us to measure the full effects of PAs, the difference we  
480 measured between protected and unprotected sites is defined statistically depending on the  
481 covariates included, which allows to understand clearly what is being included in measured  
482 effects of PA. A main advantage of large biodiversity monitoring datasets (such as breeding  
483 bird-monitoring schemes) in relation to pairwise comparisons is thus the possibility of applying  
484 a well-defined and repeatable control.

485

486 More broadly, our results highlight that clearly measuring PA effectiveness in conserving  
487 species diversity is impossible without defining precisely what is expected from them. In this  
488 study, we measured PAs effectiveness as the difference in abundance or richness between  
489 protected and unprotected sites. This definition assumes that PAs are expected to protect  
490 globally species diversity, and therefore gathers our ability to protect richest areas and to reduce  
491 human impacts on biodiversity in these areas. If PAs are expected to present higher diversity in  
492 terms of assemblage metrics (species richness or summed abundance), then we found no  
493 evidence in our analyses that PAs are effective. If PAs are expected to protect all species'  
494 populations, then we did not find they were effective either, as for about half of the 149 species  
495 studied here we found a negative effect of PAs in forest. However, our results show that North-  
496 American forest PAs present higher abundances in forest species when compared with  
497 unprotected forest sites (especially for species with low affinity to human activities). That this  
498 result holds even though we found no significant difference in total abundance suggests that  
499 bird assemblages in protected forests are more forest-typical than those in unprotected forests.  
500 Our results thus indicate that forest PAs in North-American are contributing to prevent forest  
501 habitat degradation, and associated losses in the abundance of forest specialist species. BBS  
502 routes do not currently cover sufficiently well other habitats besides forest to allow us to  
503 investigate whether the same result applies to PAs with a different vegetation structure, but  
504 datasets with a bigger proportion of sampling points inside PAs, across all habitats, would help  
505 investigating this question.

506

507 Overall, our results emphasize the complexity of resolving a question that seemed so  
508 straightforward, and whose answer seemed so intuitive. In practice, understanding whether PAs  
509 are effective or not, and quantifying such effects, involves defining clearly what effect is being  
510 tested, on which facet of species diversity, and how to obtain appropriate counterfactuals.

511 **Data accessibility statement:**

512 All data used in the study (birds and landscape covariates) are public and accessible to anybody.  
513 All sources are given with references.

514

515 **References:**

516

517

518 Andam, K.S., Ferraro, P.J., Pfaff, A., Sanchez-Azofeifa, G.A., and Robalino, J.A. (2008).  
519 Measuring the effectiveness of protected area networks in reducing deforestation. *Proc. Natl.*  
520 *Acad. Sci.* *105*, 16089–16094.

521 Balmford, A., and Bond, W. (2005). Trends in the state of nature and their implications for  
522 human well-being: Trends in the state of nature. *Ecol. Lett.* *8*, 1218–1234.

523 Bartholomé, E., and Belward, A.S. (2005). GLC2000: a new approach to global land cover  
524 mapping from Earth observation data. *Int. J. Remote Sens.* *26*, 1959–1977.

525 Bihn, J.H., Verhaagh, M., Brändle, M., and Brandl, R. (2008). Do secondary forests act as  
526 refuges for old growth forest animals? Recovery of ant diversity in the Atlantic forest of  
527 Brazil. *Biol. Conserv.* *141*, 733–743.

528 Boulinier, T., Nichols, J.D., Sauer, J.R., Hines, J.E., and Pollock, K.H. (1998). Estimating  
529 species richness: the importance of heterogeneity in species detectability. *Ecology* *79*, 1018–  
530 1028.

531 Brooks, T.M., Bakarr, M.I., Boucher, T., Da Fonseca, G.A.B., Hilton-Taylor, C., Hoekstra,  
532 J.M., Moritz, T., Olivieri, S., Parrish, J., Pressey, R.L., et al. (2004). Coverage Provided by  
533 the Global Protected-Area System: Is It Enough? *BioScience* *54*, 1081.

534 Calenge, C. (2006). The package “adehabitat” for the R software: A tool for the analysis of  
535 space and habitat use by animals. *Ecol. Model.* *197*, 516–519.

536 Ceballos, G., Ehrlich, P.R., and Dirzo, R. (2017). Biological annihilation via the ongoing  
537 sixth mass extinction signaled by vertebrate population losses and declines. *Proc. Natl. Acad.*  
538 *Sci.* 201704949.

539 Coetzee, B.W.T., Gaston, K.J., and Chown, S.L. (2014). Local Scale Comparisons of  
540 Biodiversity as a Test for Global Protected Area Ecological Performance: A Meta-Analysis.  
541 *PLOS ONE* *9*, e105824.

542 Del Hoyo, J., Elliott, A., and Sargatal, J. (2013). *Handbook of the birds of the World*  
543 (Barcelona, Spain).

544 Devictor, V., Godet, L., Julliard, R., Couvet, D., and Jiguet, F. (2007). Can common species  
545 benefit from protected areas? *Biol. Conserv.* *139*, 29–36.

546 Drummond, A.J., Suchard, M.A., Xie, D., and Rambaut, A. (2012). Bayesian Phylogenetics  
547 with BEAUti and the BEAST 1.7. *Mol. Biol. Evol.* *29*, 1969–1973.



- 548 Duckworth, G.D., and Altwegg, R. (2018). Effectiveness of protected areas for bird  
549 conservation depends on guild. *Divers. Distrib.*
- 550 Dudley, N. (2008). Guidelines for applying protected area management categories (Iucn).
- 551 Ewers, R.M., and Rodrigues, A.S.L. (2008). Estimates of reserve effectiveness are  
552 confounded by leakage. *Trends Ecol. Evol.* 23, 113–116.
- 553 Foley, J.A., DeFries, R., Asner, G.P., Barford, C., Bonan, G., Carpenter, S.R., Chapin, F.S.,  
554 Coe, M.T., Daily, G.C., Gibbs, H.K., et al. (2005). Global Consequences of Land Use.  
555 *Science* 309, 570–574.
- 556 Gamero, A., Brotons, L., Brunner, A., Foppen, R., Fornasari, L., Gregory, R.D., Herrando, S.,  
557 Hořák, D., Jiguet, F., Kmecl, P., et al. (2017). Tracking Progress Toward EU Biodiversity  
558 Strategy Targets: EU Policy Effects in Preserving its Common Farmland Birds. *Conserv. Lett.*  
559 10, 395–402.
- 560 Geldmann, J., Barnes, M., Coad, L., Craigie, I.D., Hockings, M., and Burgess, N.D. (2013).  
561 Effectiveness of terrestrial protected areas in reducing habitat loss and population declines.  
562 *Biol. Conserv.* 161, 230–238.
- 563 Gray, C.L., Hill, S.L.L., Newbold, T., Hudson, L.N., Börger, L., Contu, S., Hoskins, A.J.,  
564 Ferrier, S., Purvis, A., and Scharlemann, J.P.W. (2016). Local biodiversity is higher inside  
565 than outside terrestrial protected areas worldwide. *Nat. Commun.* 7, 12306.
- 566 Hiley, J.R., Bradbury, R.B., and Thomas, C.D. (2016). Impacts of habitat change and  
567 protected areas on alpha and beta diversity of Mexican birds. *Divers. Distrib.* 22, 1245–1254.
- 568 IUCN (2018). IUCN Red List of Threatened Species. Versio 2018.1. <http://iucnredlist.org>.
- 569 Jetz, W., Thomas, G.H., Joy, J.B., Hartmann, K., and Mooers, A.O. (2012). The global  
570 diversity of birds in space and time. *Nature* 491, 444–448.
- 571 Joppa, L.N., and Pfaff, A. (2009). High and Far: Biases in the Location of Protected Areas.  
572 *PLoS One* 4.
- 573 Kerbiriou, C., Azam, C., Touroult, J., Marmet, J., Julien, J.-F., and Pellissier, V. (2018).  
574 Common bats are more abundant within Natura 2000 areas. *Biol. Conserv.* 217, 66–74.
- 575 Lee, T.M., Sodhi, N.S., and Prawiradilaga, D.M. (2007). THE IMPORTANCE OF  
576 PROTECTED AREAS FOR THE FOREST AND ENDEMIC AVIFAUNA OF SULAWESI  
577 (INDONESIA). *Ecol. Appl.* 17, 1727–1741.
- 578 Leverington, F., Costa, K.L., Pavese, H., Lisle, A., and Hockings, M. (2010). A Global  
579 Analysis of Protected Area Management Effectiveness. *Environ. Manage.* 46, 685–698.
- 580 McCarthy, J.L., McCarthy, K.P., Fuller, T.K., and McCarthy, T.M. (2010). Assessing  
581 Variation in Wildlife Biodiversity in the Tien Shan Mountains of Kyrgyzstan Using Ancillary  
582 Camera-trap Photos. *Mt. Res. Dev.* 30, 295–301.
- 583 McRae, L., Freeman, R., and Marconi, V. (2016). “The Living Planet index” in: Living Planet  
584 Report 2016: Risk and resilience in a new era (ed. Oerlemans N). (Gland, Switzerland).

- 585 Naidoo, R. (2004). Species richness and community composition of songbirds in a tropical  
586 forest-agricultural landscape. *Anim. Conserv.* 7, 93–105.
- 587 NASA (2017). Net Primary Productivity (Terra/Modis) NASA Earth Observations (monthly  
588 data 2004-2015).
- 589 National Geophysical Data Center (1999). Global Land One-kilometer Base Elevation  
590 (GLOBE), version 1.
- 591 Nelson, A., and Chomitz, K.M. (2009). Protected Area Effectiveness in Reducing Tropical  
592 Deforestation (Washington DC, USA: Independent Evaluation Group, The World Bank).
- 593 Pardieck, K.L., Ziolkowski, D.J., Lutmerding, M., Campbell, K., and Hudson, M.-A.R.  
594 (2017). North American Breeding Bird Survey Dataset 1966 - 2016, version 2016.0.
- 595 Pellissier, V., Touroult, J., Julliard, R., Sibley, J.P., and Jiguet, F. (2013). Assessing the Natura  
596 2000 network with a common breeding birds survey: Assessing Natura 2000 with a common  
597 breeding birds survey. *Anim. Conserv.* 16, 566–574.
- 598 Rodrigues, A.S.L., Andelman, S.J., Bakarr, M.I., Boitani, L., Brooks, T.M., Cowling, R.M.,  
599 Fishpool, L.D.C., da Fonseca, G.A.B., Gaston, K.J., Hoffmann, M., et al. (2004).  
600 Effectiveness of the global protected area network in representing species diversity. *Nature*  
601 428, 640–643.
- 602 Roxburgh, S.H., Shea, K., and Wilson, J.B. (2004). The intermediate disturbance hypothesis:  
603 patch dynamics and mechanisms of species coexistence. *Ecology* 85, 359–371.
- 604 Sauer, J.R., Niven, D.K., Hines, J.E., Ziolkowski, D.J.J., Pardieck, K.L., Fallon, J.E., and  
605 Link, W.A. (2017). The North American Breeding Bird Survey, Results and Analysis 1966 -  
606 2015. Version 2.07.2017 (Laurel, MD: USGS Patuxent Wildlife Research Center).
- 607 Sinclair, A.R.E., Mduma, S.A.R., and Arcese, P. (2002). Protected areas as biodiversity  
608 benchmarks for human impact: agriculture and the Serengeti avifauna. *Proc. R. Soc. Lond.*  
609 *Ser. B-Biol. Sci.* 269, 2401–2405.
- 610 Small, M.F., Veech, J.A., and Jensen, J.L.R. (2012). Local landscape composition and  
611 configuration around North American Breeding Bird Survey routes: *Ecological Archives*  
612 E093-215. *Ecology* 93, 2298–2298.
- 613 Tung Ho, L. si, and Ané, C. (2014). A Linear-Time Algorithm for Gaussian and Non-  
614 Gaussian Trait Evolution Models. *Syst. Biol.* 63, 397–408.
- 615 UNEP-WCMC, and IUCN (2018). Protected Planet: [WDPA-shapefile-polygons; The World  
616 Database on Protected Areas (WDPA)/The Global Database on Protected Areas Management  
617 Effectiveness (GD-PAME)] [On-line], [downloaded 02/10/2018], Cambridge, UK: UNEP-  
618 WCMC and IUCN. Available at: [www.protectedplanet.net](http://www.protectedplanet.net).
- 619 UNEP-WCMC IUCN (2016). Protected Planet Report (Cambridge UK and Gland,  
620 Switzerland: UNEP-WCMC and IUCN).

- 621 Venter, O., Sanderson, E.W., Magrath, A., Allan, J.R., Beher, J., Jones, K.R., Possingham,  
622 H.P., Laurance, W.F., Wood, P., Fekete, B.M., et al. (2016). Global terrestrial Human  
623 Footprint maps for 1993 and 2009. *Sci. Data* 3, 160067.
- 624 Vié, J.-C., Hilton-Taylor, C., and Stuart, S.N. (2009). *Wildlife in a changing world: an*  
625 *analysis of the 2008 IUCN red list of threatened species* (Gland, Switzerland : Barcelona,  
626 Spain: IUCN ; Lynx Edicions).
- 627 Wasiolka, B., and Blaum, N. (2011). Comparing biodiversity between protected savanna and  
628 adjacent non-protected farmland in the southern Kalahari. *J. Arid Environ.* 75, 836–841.
- 629 Wunderle, J.M., Henriques, L.M.P., and Willig, M.R. (2006). Short-Term Responses of Birds  
630 to Forest Gaps and Understory: An Assessment of Reduced-Impact Logging in a Lowland  
631 Amazon Forest <sup>1</sup>: Reduced-Impact Logging Effects on Amazon Birds. *Biotropica* 38, 235–  
632 255.
- 633
